# Supplementary material for: NGS-based biodiversity and community structure analysis of meiofaunal eukaryotes in shell sand from Hållö island, Smögen, and soft mud from Gullmarn Fjord, Sweden
Source: Biodivers Data J. 2017 Jun 8;(5):e12731. doi: 10.3897/BDJ.5.e12731 (PMC5523155; doi:10.3897/BDJ.5.e12731)
Supplement: Supplementary material 1 — OTUs identified to species level in the samples using 97% sequence similarity, all organism groups [file bdj-05-e12731-s001.xlsx]

## Sheet: TableS1
A. CO1
Metazoa
ID	O.T.U.	Location	Nb of reads	Phylum	Class	Order	Family	Genus	Species
HE5.Lobo_493462	OTU_1	Hållö Island, Gullmarn Fjord	571790	Annelida	Polychaeta	Polychaeta_incertae_sedis	_	_
TS2.Leray_4491798	OTU_2	Hållö Island, Gullmarn Fjord	316559	Annelida	Polychaeta	Spionida	_	_
TS4.Lobo_1502925	OTU_3	Hållö Island, Gullmarn Fjord	195999	Annelida	Polychaeta	Spionida	_	_
HF2.Lobo_2136301	OTU_4	Hållö Island, Gullmarn Fjord	178929	Annelida	Polychaeta	Phyllodocida	Sigalionidae	Pisione	Pisione remota
HE6.Leray_2958692	OTU_5	Hållö Island, Gullmarn Fjord	69642	Annelida	Polychaeta	Phyllodocida	Glyceridae	Glycera	Glycera alba
HE3.Leray_364663	OTU_6	Hållö Island, Gullmarn Fjord	59407	Annelida	Polychaeta	Phyllodocida	Nereididae	Platynereis	Platynereis dumerilli
HF4.Lobo_97092	OTU_7	Hållö Island, Gullmarn Fjord	29391	Annelida	Clitellata	Haplotaxida	Tubificidae	Tubificoides	Tubificoides benedii
TF1.Leray_2314881	OTU_8	Hållö Island, Gullmarn Fjord	29235	Annelida	Polychaeta	Terebellida	Cirratulidae	Tharyx
HE1.Lobo_933012	OTU_9	Hållö Island, Gullmarn Fjord	14954	Annelida	Clitellata	Haplotaxida	Enchytraeidae	Grania	Grania postclitellochaeta
TF1.Lobo_2832834	OTU_10	Hållö Island, Gullmarn Fjord	9348	Annelida	Polychaeta	Terebellida	_	_
TS2.Leray_4445240	OTU_11	Hållö Island, Gullmarn Fjord	8815	Annelida	Polychaeta	Eunicida	Dorvilleidae	Parougia	Parougia eliasoni
TF1.Leray_2475372	OTU_12	Hållö Island, Gullmarn Fjord	6353	Annelida	Polychaeta	Terebellida	Ampharetidae	Sosane	Sosane wahrbergi
TF3.Leray_6645504	OTU_13	Hållö Island, Gullmarn Fjord	5196	Annelida	Polychaeta	Opheliida	_	_
TS5.Lobo_6031643	OTU_14	Hållö Island, Gullmarn Fjord	5089	Annelida	Polychaeta	Opheliida	_	_
HF1.Lobo_4996219	OTU_15	Hållö Island, Gullmarn Fjord	4596	Annelida	Polychaeta	Canalipalpata	Polygordiidae	Polygordius	Polygordius appendiculatus
TS2.Lobo_6962270	OTU_16	Hållö Island, Gullmarn Fjord	4595	Annelida	Polychaeta	Sabellida	Oweniidae	Galathowenia	Galathowenia oculata
TS3.Lobo_1308935	OTU_17	Hållö Island, Gullmarn Fjord	4213	Annelida	Polychaeta	Phyllodocida	Phyllodocidae	Eumida	Eumida ockelmanni
HF5.Lobo_3178682	OTU_18	Hållö Island, Gullmarn Fjord	2894	Annelida	Polychaeta	Spionida	Spionidae	Spiophanes	Spiophanes bombyx
TF1.Lobo_2848745	OTU_19	Hållö Island, Gullmarn Fjord	1305	Annelida	Polychaeta	Terebellida	Pectinariidae	Amphictene	Amphictene auricoma
TS1.Leray_614419	OTU_20	Hållö Island, Gullmarn Fjord	788	Annelida	Polychaeta	Terebellida	_	_
HF8.Lobo_5239705	OTU_21	Hållö Island, Gullmarn Fjord	241	Annelida	Clitellata	Haplotaxida	Enchytraeidae	Grania	Grania variochaeta
TS5.Leray_1638834	OTU_22	Hållö Island, Gullmarn Fjord	102	Annelida	Polychaeta	Terebellida	Pectinariidae	Lagis	Lagis koreni
HF7.Leray_1672792	OTU_23	Hållö Island, Gullmarn Fjord	69	Annelida	Polychaeta	Phyllodocida	Goniadidae	Glycinde	Glycinde nordmanni
HE9.Lobo_2191024	OTU_24	Hållö Island, Gullmarn Fjord	8	Annelida	Polychaeta	Terebellida	Acrocirridae	Macrochaeta	Macrochaeta clavicornis
HF4.Leray_6193380	OTU_25	Hållö Island, Gullmarn Fjord	66039	Arthropoda	Malacostraca	Amphipoda	Atylidae	Atylus	Atylus vedlomensis
HE2.Lobo_2023271	OTU_26	Hållö Island, Gullmarn Fjord	21589	Arthropoda	Malacostraca	Amphipoda	_	_
HE1.Lobo_914374	OTU_27	Hållö Island, Gullmarn Fjord	14588	Arthropoda	Malacostraca	Amphipoda	Corophioidea	Monocorophium	Monocorophium insidiosum
TF6.Leray_5321299	OTU_28	Hållö Island, Gullmarn Fjord	11588	Arthropoda	Malacostraca	Cumacea	_	_
HF9.Leray_4391714	OTU_29	Hållö Island, Gullmarn Fjord	11307	Arthropoda	Maxillopoda	Sessilia	Balanidae	Balanus	Balanus balanus
TF5.Lobo_6391642	OTU_30	Hållö Island, Gullmarn Fjord	10097	Arthropoda	Branchiopoda	Diplostraca	Sididae	Penilia	Penilia avirostris
TF6.Leray_5332240	OTU_31	Hållö Island, Gullmarn Fjord	7399	Arthropoda	Maxillopoda	Calanoida	Acartiidae	Acartia	Acartia tonsa
HE7.Leray_3803390	OTU_32	Hållö Island, Gullmarn Fjord	5325	Arthropoda	Maxillopoda	Calanoida	Paracalanidae	Paracalanus	Paracalanus parvus
HF8.Leray_5586003	OTU_33	Hållö Island, Gullmarn Fjord	2864	Arthropoda	Malacostraca	Decapoda	Hippolytidae	Eualus	Eualus cranchii
TF5.Lobo_6459477	OTU_34	Hållö Island, Gullmarn Fjord	1279	Arthropoda	Malacostraca	Decapoda	Crangonidae	Philocheras	Philocheras bispinosus bispinosus
HF4.Leray_6295260	OTU_35	Hållö Island, Gullmarn Fjord	1079	Arthropoda	Maxillopoda	Sessilia	Balanidae	Balanus	Balanus balanus
HF7.Leray_1683272	OTU_36	Hållö Island, Gullmarn Fjord	927	Arthropoda	Maxillopoda	Calanoida	Acartiidae	Acartia	Acartia tonsa
TF5.Lobo_6373065	OTU_37	Hållö Island, Gullmarn Fjord	809	Arthropoda	Maxillopoda	Calanoida	Temoridae	Temora	Temora longicornis
HE5.Lobo_479906	OTU_38	Hållö Island, Gullmarn Fjord	152	Arthropoda	Insecta	Diptera	Chironomidae	Tanytarsus	Tanytarsus usmaensis
TS3.Lobo_1208905	OTU_39	Hållö Island, Gullmarn Fjord	116	Arthropoda	Maxillopoda	Harpacticoida	Harpacticidae	Harpacticus	Harpacticus flexus
HF8.Lobo_5106754	OTU_40	Hållö Island, Gullmarn Fjord	82	Arthropoda	Maxillopoda	Calanoida	Centropagidae	Centropages	Centropages typicus
HE4.Lobo_4138563	OTU_41	Hållö Island, Gullmarn Fjord	42	Arthropoda	Malacostraca	Decapoda	Porcellanidae	Pisidia	Pisidia longicornis
HF7.Lobo_5810493	OTU_42	Hållö Island, Gullmarn Fjord	41	Arthropoda	Maxillopoda	Calanoida	Centropagidae	Centropages	Centropages hamatus
HF3.Leray_7129076	OTU_43	Hållö Island, Gullmarn Fjord	22	Arthropoda	Maxillopoda	Calanoida	Acartiidae	Acartia	Acartia clausi
TS3.Lobo_1213146	OTU_44	Hållö Island, Gullmarn Fjord	17	Arthropoda	Malacostraca	Isopoda	Asellidae	Asellus	Asellus aquaticus
TS4.Leray_7402581	OTU_45	Hållö Island, Gullmarn Fjord	10	Arthropoda	Insecta	Diptera	_	_
TF5.Leray_2910679	OTU_46	Hållö Island, Gullmarn Fjord	6	Arthropoda	Insecta	Diptera	Chironomidae	Procladius	Procladius sp.
HF9.Lobo_7599310	OTU_47	Hållö Island, Gullmarn Fjord	3	Arthropoda	Insecta	Diptera	Chironomidae	Psectrocladius	Psectrocladius yunoquartus
TS3.Lobo_1162454	OTU_48	Hållö Island, Gullmarn Fjord	2	Arthropoda	Insecta	Diptera	Chironomidae	Chironomus	Chironomus aprilinus
HE8.Lobo_873511	OTU_49	Hållö Island, Gullmarn Fjord	131011	Chordata	Leptocardii	-	Branchiostomatidae	Branchiostoma	Branchiostoma lanceolatum
TF1.Lobo_2807051	OTU_50	Hållö Island, Gullmarn Fjord	486	Chordata	Actinopterygii	Perciformes	Gobiidae	Lesueurigobius	Lesueurigobius friesii
TS1.Leray_646185	OTU_51	Hållö Island, Gullmarn Fjord	73	Chordata	Actinopterygii	Gasterosteiformes	Gasterosteidae	Gasterosteus	Gasterosteus aculeatus
TF3.Leray_6588680	OTU_52	Hållö Island, Gullmarn Fjord	3869	Cnidaria	Anthozoa	Pennatulacea	Funiculinidae	Funiculina	Funiculina sp.
TF6.Leray_5512978	OTU_53	Hållö Island, Gullmarn Fjord	1481	Cnidaria	Hydrozoa	Leptothecata	Eirenidae	Eutima	Eutima gracilis
HF5.Lobo_3253786	OTU_54	Hållö Island, Gullmarn Fjord	232	Cnidaria	Scyphozoa	Semaeostomeae	Ulmaridae	Aurelia	Aurelia aurita
HE3.Leray_361248	OTU_55	Hållö Island, Gullmarn Fjord	14	Cnidaria	Scyphozoa	Semaeostomeae	Cyaneidae	Cyanea	Cyanea capillata
TS3.Leray_6733304	OTU_56	Hållö Island, Gullmarn Fjord	1027065	Echinodermata	Ophiuroidea	Ophiurida	_	_
TF1.Leray_2426830	OTU_57	Hållö Island, Gullmarn Fjord	16603	Echinodermata	Ophiuroidea	Ophiurida	Ophiuridae	Ophiura	Ophiura albida
TF3.Leray_6591339	OTU_58	Hållö Island, Gullmarn Fjord	2079	Echinodermata	Echinoidea	Spatangoida	Brissidae	Brissopsis	Brissopsis lyrifera
HF4.Leray_6293728	OTU_59	Hållö Island, Gullmarn Fjord	71	Echinodermata	Echinoidea	Clypeasteroida	Fibulariidae	Echinocyamus	Echinocyamus pusillus
TS5.Lobo_6025603	OTU_60	Hållö Island, Gullmarn Fjord	11	Echinodermata	Holothuroidea	Dendrochirotida	Phyllophoridae	Thyone	Thyone fusus
TS3.Leray_6727248	OTU_61	Hållö Island, Gullmarn Fjord	56213	Mollusca	Bivalvia	Veneroida	Semelidae	Abra	Abra nitida
HE7.Leray_3779267	OTU_62	Hållö Island, Gullmarn Fjord	14392	Mollusca	Bivalvia	Veneroida	Montacutidae	Tellimya	Tellimya ferruginosa
HF4.Leray_6295954	OTU_63	Hållö Island, Gullmarn Fjord	2965	Mollusca	Gastropoda	Sacoglossa	Plakobranchidae	Elysia	Elysia viridis
TF5.Leray_2915847	OTU_64	Hållö Island, Gullmarn Fjord	1911	Mollusca	Bivalvia	Veneroida	Montacutidae	Kurtiella	Kurtiella bidentata
HF3.Leray_7058438	OTU_65	Hållö Island, Gullmarn Fjord	371	Mollusca	Bivalvia	Myoida	Corbulidae	Corbula	Corbula gibba
HE3.Lobo_4838288	OTU_66	Hållö Island, Gullmarn Fjord	34	Mollusca	Gastropoda	Neogastropoda	Mangeliidae	Mangelia	Mangelia attenuata
HE4.Lobo_4121128	OTU_67	Hållö Island, Gullmarn Fjord	25	Mollusca	Bivalvia	Veneroida	Veneridae	Dosinia	Dosinia lupinus
TS1.Lobo_4644275	OTU_68	Hållö Island, Gullmarn Fjord	2	Nemertea	Anopla	_	Lineidae	Cerebratulus	Cerebratulus sp.
HE4.Leray_3148053	OTU_69	Hållö Island, Gullmarn Fjord	1664	Porifera	Demospongiae	Suberitida	Halichondriidae	Halichondria	Halichondria panicea
TS5.Leray_1547671	OTU_70	Hållö Island, Gullmarn Fjord	2628	Priapulida	Priapulimorpha	Priapulimorphida	Priapulidae	Priapulus	Priapulus caudatus
Other taxa
ID	O.T.U.	Location	Nb of reads	Phylum	Class	Order	Family	Genus	Species
HF5.Lobo_3488169	OTU_71	Hållö Island, Gullmarn Fjord	1748	Ascomycota	Sordariomycetes	Hypocreales	Ophiocordycipitaceae	Purpureocillium	Purpureocillium lilacinum
HF6.Lobo_2614782	OTU_72	Hållö Island, Gullmarn Fjord	52	Chlorophyta	Prasinophyceae	Pseudoscourfieldiales	Pycnococcaceae	Pycnococcus	Pycnococcus provasolii
HE1.Lobo_951876	OTU_73	Hållö Island, Gullmarn Fjord	222	Dinoflagellata	Syndiniophyceae	Syndiniales	Syndiniaceae	Hematodinium	Hematodinium sp.
HF4.Leray_6170684	OTU_74	Hållö Island, Gullmarn Fjord	331	Haptophyta	Prymnesiophyceae	Isochrysidales	Neolaerhabdaceae	Emiliana	Emiliana huxleyi
HE7.Lobo_7772724	OTU_75	Hållö Island, Gullmarn Fjord	2631	Ochrophyta	Phaeophyceae	Fucales	Sargassaceae	Halidrys	Halidrys siliquosa
HE3.Lobo_4848587	OTU_76	Hållö Island, Gullmarn Fjord	836	Ochrophyta	Phaeophyceae	Sphacelariales	Sphacelariaceae	Sphacelaria	Sphacelaria sp.
HF4.Lobo_23756	OTU_77	Hållö Island, Gullmarn Fjord	249	Ochrophyta	Phaeophyceae	Ectocarpales	Pilayelleceae	Pilayella	Pilayella littoralis
HE2.Lobo_1981416	OTU_78	Hållö Island, Gullmarn Fjord	80	Ochrophyta	Phaeophyceae	Laminariales	Chordaceae	Chorda	Chorda filum
TF1.Lobo_2769066	OTU_79	Hållö Island, Gullmarn Fjord	3	Ochrophyta	Bacillariophyceae	Thalassiosirales	Skeletonemaceae	Skeletonema	Skeletonema marinoi
HE5.Leray_1344432	OTU_80	Hållö Island, Gullmarn Fjord	36448	Rhodophyta	Florideophyceae	Bonnemaisoniales	Bonnemaisoniaceae	Bonnemaisonia	Bonnemaisonia hamifera
HE7.Leray_3795215	OTU_81	Hållö Island, Gullmarn Fjord	321	Rhodophyta	Florideophyceae	Gigartinales	Solieriaceae	Eucheuma	Eucheuma denticulatum
Metazoa
ID	O.T.U.	Location	Nb of reads	Phylum	Class	Order	Family	Genus	Species
HF9.Lobo_7588557	OTU_82	Hållö Island	891	Annelida	Polychaeta	Spionida	Spionidae	_
HF2.Lobo_2052205	OTU_83	Hållö Island	285	Annelida	Polychaeta	Terebellida	Cirratulidae	Dodecaceria	Dodecaceria concharum
HF4.Lobo_96799	OTU_84	Hållö Island	102	Annelida	Polychaeta	Terebellida	Cirratulidae	Cirratulus	Cirratulus cirratus
HF1.Lobo_5059232	OTU_85	Hållö Island	13	Annelida	Polychaeta	Phyllodocida	Hesionidae	Gyptis	Gyptis propinqua
HE4.Leray_3067470	OTU_86	Hållö Island	3	Annelida	Polychaeta	Spionida	Chaetopteridae	Chaetopterus	Chaetopterus sarsi
HE6.Lobo_7972794	OTU_87	Hållö Island	3	Annelida	Clitellata	Haplotaxida	Tubificidae	Adelodrilus	Adelodrilus pusillus
HF9.Lobo_7688887	OTU_88	Hållö Island	3	Annelida	Polychaeta	Phyllodocida	Hesionidae	Nereimyra	Nereimyra punctata
HE6.Lobo_7972042	OTU_89	Hållö Island	2	Annelida	Polychaeta	Phyllodocida	Syllidae	Myrianida	Myrianida edwarsi
HE8.Leray_7284535	OTU_90	Hållö Island	2	Annelida	Polychaeta	Phyllodocida	_	_
HE8.Lobo_858951	OTU_91	Hållö Island	1	Annelida	Polychaeta	Terebellida	_	_
HF1.Lobo_4965916	OTU_92	Hållö Island	1	Annelida	Polychaeta	Spionida	Spionidae	Malacoceros	Malacoceros fuliginosus
HF5.Leray_4035802	OTU_93	Hållö Island	1	Annelida	Polychaeta	Eunicida	Dorvilleidae	Ophryotrocha	Ophryotrocha maculata
HF5.Lobo_3297996	OTU_94	Hållö Island	1	Annelida	Clitellata	Haplotaxida	Tubificidae	Tubificoides	Tubificoides kozloffi
HF9.Leray_4404528	OTU_95	Hållö Island	1	Annelida	Polychaeta	Spionida	Spionidae	Polydora	Polydora cornuta
HF9.Lobo_7587930	OTU_96	Hållö Island	1	Annelida	Polychaeta	Opheliida	_	_
HF9.Lobo_7695035	OTU_97	Hållö Island	1	Annelida	Polychaeta	Phyllodocida	Polynoidae	Lepidonotus	Lepidonotus squamatus
HF1.Leray_2493444	OTU_98	Hållö Island	3911	Arthropoda	Malacostraca	Amphipoda	_	_
HE1.Lobo_952576	OTU_99	Hållö Island	3739	Arthropoda	Malacostraca	Decapoda	Polybiidae	Liocarcinus	Liocarcinus navigator
HF9.Leray_4291607	OTU_100	Hållö Island	1372	Arthropoda	Malacostraca	Decapoda	Alpheidae	Athanas	Athanas nitescens
HE8.Lobo_823478	OTU_101	Hållö Island	108	Arthropoda	Maxillopoda	Harpacticoida	_	_	Harpacticoida sp.
HF4.Leray_6242499	OTU_102	Hållö Island	45	Arthropoda	Maxillopoda	Cyclopoida	_	_
HE1.Lobo_982378	OTU_103	Hållö Island	38	Arthropoda	Branchiopoda	Diplostraca	Podonidae	Evadne	Evadne nordmanni
HF8.Leray_5612792	OTU_104	Hållö Island	37	Arthropoda	Malacostraca	Decapoda	Hippolytidae	Eualus	Eualus cranchii
HE8.Leray_7306131	OTU_105	Hållö Island	2	Arthropoda	Malacostraca	Decapoda	Processidae	Processa	Processa modica
HF4.Leray_6206299	OTU_106	Hållö Island	2	Arthropoda	Maxillopoda	Harpacticoida	_	_
HF7.Leray_1785147	OTU_107	Hållö Island	2	Arthropoda	Maxillopoda	Sessilia	Verrucidae	Verruca	Verruca stroemia
HE1.Leray_1117391	OTU_108	Hållö Island	1	Arthropoda	Pycnogonida	Pantopoda	Endeidae	Endeis	Endeis sp.inosa
HE1.Lobo_995710	OTU_109	Hållö Island	1	Arthropoda	Maxillopoda	Harpacticoida	Tachidiidae	Tachidius	Tachidius discipes
HE2.Lobo_2010882	OTU_110	Hållö Island	1	Arthropoda	Maxillopoda	Calanoida	Pontellidae	Anomalocera	Anomalocera patersoni
HE3.Lobo_4900763	OTU_111	Hållö Island	1	Arthropoda	Malacostraca	Amphipoda	Ampeliscidae	Ampelisca	Ampelisca brevicornis
HE6.Lobo_7849183	OTU_112	Hållö Island	1	Arthropoda	Malacostraca	Amphipoda	Corophiidae	Leptocheirus	Leptocheirus hirsutimanus
HE8.Leray_7216397	OTU_113	Hållö Island	1	Arthropoda	Malacostraca	Amphipoda	Corophiinae	Corophium	Corophium volutator
HE8.Leray_7251655	OTU_114	Hållö Island	1	Arthropoda	Maxillopoda	Calanoida	Temoridae	Eurytemora	Eurytemora affinis
HE8.Lobo_860608	OTU_115	Hållö Island	1	Arthropoda	Malacostraca	Amphipoda	_	_
HF4.Leray_6092514	OTU_116	Hållö Island	1	Arthropoda	Maxillopoda	Poecilostomatoida	_	_
HF4.Lobo_5006	OTU_117	Hållö Island	1	Arthropoda	Insecta	Diptera	Chironomidae	Cryptochironomus	Cryptochironomus supplicans
HF9.Leray_4411242	OTU_118	Hållö Island	1	Arthropoda	Maxillopoda	Calanoida	Clausocalanidae	Pseudocalanus	Pseudocalanus elongatus
HF9.Lobo_7623741	OTU_119	Hållö Island	1	Arthropoda	Branchiopoda	Diplostraca	Podonidae	Pleopis	Pleopis polyphemoides
HE3.Lobo_4881810	OTU_120	Hållö Island	541	Bryozoa	Gymnolaemata	Cheilostomatida	Candidae	Scrupocellaria	Scrupocellaria scruposa
HF7.Leray_1838377	OTU_121	Hållö Island	98	Bryozoa	Gymnolaemata	Cheilostomatida	Membraniporidae	Membranipora	Membranipora membranacea
HE9.Lobo_2173983	OTU_122	Hållö Island	63	Bryozoa	Gymnolaemata	Cheilostomatida	Romancheinidae	Escharella	Escharella immersa
HF5.Lobo_3158598	OTU_123	Hållö Island	5	Bryozoa	Stenolaemata	Cyclostomatida	Crisiidae	Crisia	Crisia eburnea
HF6.Lobo_2617384	OTU_124	Hållö Island	2	Bryozoa	Gymnolaemata	Ctenostomata	Vesiculariidae	Amathia	Amathia gracilis
HE6.Leray_2983148	OTU_125	Hållö Island	31	Chaetognatha	Sagittoidea	Aphragmophora	_	_
HF3.Lobo_3538759	OTU_126	Hållö Island	472	Chordata	Actinopterygii	Perciformes	Gobiidae	Gobius	Gobius niger
HF1.Leray_2487062	OTU_127	Hållö Island	288	Chordata	Actinopterygii	Perciformes	Labridae	Ctenolabrus	Ctenolabrus rupestris
HE8.Lobo_879846	OTU_128	Hållö Island	265	Chordata	Actinopterygii	Pleuronectiformes	Soleidae	Solea	Solea solea
HE2.Lobo_1914646	OTU_129	Hållö Island	81	Chordata	Actinopterygii	Pleuronectiformes	Pleuronectidae	Limanda	Limanda limanda
HF5.Lobo_3273051	OTU_130	Hållö Island	43	Chordata	Actinopterygii	Perciformes	Trachinidae	Trachinus	Trachinus draco
HE8.Lobo_756051	OTU_131	Hållö Island	34	Chordata	Actinopterygii	Salmoniformes	Salmonidae	Salmo	Salmo trutta
HF3.Lobo_3595218	OTU_132	Hållö Island	14	Chordata	Ascidiacea	Phlebobranchia	Ascidiidae	Phallusia	Phallusia ingeria
HF9.Lobo_7596943	OTU_133	Hållö Island	8	Chordata	Actinopterygii	Perciformes	Mullidae	Mullus	Mullus surmuletus
HF4.Lobo_208606	OTU_134	Hållö Island	1	Chordata	Actinopterygii	Perciformes	Ammodytidae	Ammodytes	Ammodytes marinus
HE2.Leray_6571642	OTU_135	Hållö Island	184	Cnidaria	Staurozoa	Stauromedusae	Depastridae	Craterolophus	Craterolophus convolvulus
HE9.Lobo_2164485	OTU_136	Hållö Island	2	Cnidaria	Hydrozoa	Anthoathecata	Rathkeidae	Lizzia	Lizzia blondina
HE2.Leray_6553538	OTU_137	Hållö Island	1	Cnidaria	Staurozoa	Stauromedusae	_	_
HE7.Leray_3802459	OTU_138	Hållö Island	570	Echinodermata	Asteroidea	Forcipulatida	Asteriidae	Asterias	Asterias rubens
HE8.Leray_7326980	OTU_139	Hållö Island	315	Echinodermata	Echinoidea	Echinoida	Parechinidae	Psammechinus	Psammechinus miliaris
HF7.Leray_1843674	OTU_140	Hållö Island	94	Echinodermata	Echinoidea	Spatangoida	Loveniidae	Echinocardium	Echinocardium cordatum
HE3.Leray_388102	OTU_141	Hållö Island	85	Echinodermata	Asteroidea	Forcipulatida	Asteriidae	Marthasterias	Marthasterias glacialis
HE6.Lobo_7886165	OTU_142	Hållö Island	1	Echinodermata	Echinoidea	Spatangoida	_	_
HF3.Leray_7012508	OTU_143	Hållö Island	44	Gastrotricha	_	Macrodasyida	Macrodasyidae	Macrodasys	Macrodasys sp.
HE1.Lobo_948618	OTU_144	Hållö Island	14	Gnathostomulida	Gnathostomulida_class_incertae_sedis	Bursovaginoidea	Gnathostomulidae	Gnathostomula	Gnathostomula armata
HF5.Leray_3991765	OTU_145	Hållö Island	847	Mollusca	Gastropoda	Pulmonata	Microhedylidae	Microhedyle	Microhedyle glandulifera
HF1.Leray_2520121	OTU_146	Hållö Island	559	Mollusca	Gastropoda	Nudibranchia	Facelinidae	Favorinus	Favorinus branchialis
HF5.Lobo_3167773	OTU_147	Hållö Island	166	Mollusca	Gastropoda	Sorbeoconcha	Rissoidae	Onoba	Onoba semicostata
HE2.Lobo_1939813	OTU_148	Hållö Island	155	Mollusca	Gastropoda	Nudibranchia	Polyceridae	Polycera	Polycera quadrilineata
HE2.Lobo_1993552	OTU_149	Hållö Island	50	Mollusca	Gastropoda	Nudibranchia	_	_
HF6.Lobo_2622544	OTU_150	Hållö Island	37	Mollusca	Gastropoda	Neogastropoda	Nassariidae	Nassarius	Nassarius nitidus
HF1.Leray_2592679	OTU_151	Hållö Island	33	Mollusca	Bivalvia	Veneroida	Mactridae	Spisula	Spisula subtruncata
HE1.Lobo_894587	OTU_152	Hållö Island	22	Mollusca	Bivalvia	Mytiloida	Mytilidae	Mytilus	Mytilus edulis
HE2.Lobo_1938412	OTU_153	Hållö Island	10	Mollusca	Gastropoda	Nudibranchia	Polyceridae	Polycera	Polycera quadrilineata
HE2.Lobo_1978270	OTU_154	Hållö Island	5	Mollusca	Gastropoda	Nudibranchia	Onchidorididae	Onchidoris	Onchidoris muricata
HE4.Lobo_4138137	OTU_155	Hållö Island	2	Mollusca	Gastropoda	Sorbeoconcha	Rissoidae	Pusillina	Pusillina inconspicua
HE6.Leray_2935130	OTU_156	Hållö Island	2	Mollusca	Gastropoda	Nudibranchia	_	_
HF8.Lobo_5143779	OTU_157	Hållö Island	2	Mollusca	Gastropoda	Littorinimorpha	Naticidae	Euspira	Euspira nitida
HF5.Lobo_3246886	OTU_158	Hållö Island	1	Mollusca	Cephalopoda	Sepiida	Sepiolidae	Sepietta	Sepietta neglecta
HE4.Lobo_4203493	OTU_159	Hållö Island	3	Nemertea	Palaeonemertea	_	Tubulanidae	Carinina	Carinina ochracea
HF7.Lobo_5876008	OTU_160	Hållö Island	353	Phoronida	_	_	_	Phoronis	Phoronis muelleri
HE8.Lobo_843910	OTU_161	Hållö Island	13	Porifera	Demospongiae	Chondrillida	Halisarcidae	Halisarca	Halisarca dujardini
HF5.Leray_3885266	OTU_162	Hållö Island	5	Rotifera	Eurotatoria	Flosculariaceae	Testudinellidae	Testudinella	Testudinella clypeata
HE3.Leray_357208	OTU_163	Hållö Island	2	Rotifera	Monogononta	Ploima	_	_
HF8.Lobo_5184437	OTU_164	Hållö Island	1	Sipuncula	Sipunculidea	Golfingiida	Golfingiidae	Golfingia	Golfingia vulgaris
HF9.Lobo_7719366	OTU_165	Hållö Island	2	Xenacoelomorpha	_	Acoela	Haploposthiidae	Haplogonaria	Haplogonaria viridis
HF9.Lobo_7734506	OTU_166	Hållö Island	1	Xenacoelomorpha	_	Acoela	Otocelididae	Notocelis	Notocelis Gullmarnensis
Other taxa
ID	O.T.U.	Location	Nb of reads	Phylum	Class	Order	Family	Genus	Species
HE1.Lobo_919502	OTU_167	Hållö Island	6	Chlorophyta	Mamiellophyceae	Mamiellales	Mamiellaceae	Micromonas	Micromonas pusilla
HF5.Lobo_3190585	OTU_168	Hållö Island	3	Chlorophyta	Mamiellophyceae	Mamiellales	Bathycoccaceae	Bathycoccus	Bathycoccus prasinos
HF8.Lobo_5191348	OTU_169	Hållö Island	343	Ochrophyta	Bacillariophyceae	Chaetocerotanae_incertae_sedis	Chaetocerotaceae	Chaetoceros	Chaetoceros didymus
HE4.Leray_3096402	OTU_170	Hållö Island	4	Ochrophyta	Phaeophyceae	Ectocarpales	Chordariaceae	Spermatochnus	Spermatochnus paradoxus
HE6.Lobo_7923631	OTU_171	Hållö Island	3	Ochrophyta	Bacillariophyceae	Thalassiosirales	Thalassiosiraceae	Thalassiosira	Thalassiosira punctigera
HE9.Lobo_2216820	OTU_172	Hållö Island	1364	Rhodophyta	Bangiophyceae	Bangiales	Bangiaceae	Porphyra	Porphyra umbilicalis
HE5.Lobo_506726	OTU_173	Hållö Island	3	Rhodophyta	Florideophyceae	Corallinales	Corallinaceae	Corallina	Corallina officinalis
HF5.Lobo_3357182	OTU_174	Hållö Island	2	Rhodophyta	Florideophyceae	Rhodymeniales	Rhodymeniaceae	Chrysymenia	Chrysymenia wrightii
HF3.Leray_7182558	OTU_175	Hållö Island	1	Rhodophyta	Florideophyceae	Ahnfeltiales	Ahnfeltiaceae	Ahnfeltia	Ahnfeltia plicata
HF5.Lobo_3308286	OTU_176	Hållö Island	1	Rhodophyta	Florideophyceae	_	Acrochaetiaceae	Rhodochorton	Rhodochorton sp.
HF5.Lobo_3444100	OTU_177	Hållö Island	1	Rhodophyta	Florideophyceae	Ceramiales	Callithamniaceae	Callithamnion	Callithamnion corymbosum
Metazoa
ID	O.T.U.	Location	Nb of reads	Phylum	Class	Order	Family	Genus	Species
TF6.Lobo_5247622	OTU_178	Gullmarn Fjord	9030	Annelida	Polychaeta	Capitellida	_	_
TF5.Leray_2872180	OTU_179	Gullmarn Fjord	7754	Annelida	Polychaeta	Phyllodocida	Hesionidae	Gyptis	Gyptis mackiei
TS1.Leray_545620	OTU_180	Gullmarn Fjord	7370	Annelida	Polychaeta	Amphinomida	Amphinomidae	Paramphinome	Paramphinome jeffreysii
TS3.Leray_6813257	OTU_181	Gullmarn Fjord	1852	Annelida	Polychaeta	Eunicida	_	_
TS6.Leray_5665274	OTU_182	Gullmarn Fjord	936	Annelida	Polychaeta	Spionida	_	_
TF1.Lobo_2668551	OTU_183	Gullmarn Fjord	874	Annelida	Polychaeta	Spionida	_	_
TS2.Lobo_6889557	OTU_184	Gullmarn Fjord	184	Annelida	Polychaeta	Terebellida	_	_
TS5.Leray_1557252	OTU_185	Gullmarn Fjord	88	Annelida	Polychaeta	Phyllodocida	_	_
TS1.Lobo_4669404	OTU_186	Gullmarn Fjord	5	Annelida	Polychaeta	Capitellida	_	_
TS6.Lobo_255019	OTU_187	Gullmarn Fjord	3	Annelida	Polychaeta	Terebellida	_	_
TF5.Lobo_6394093	OTU_188	Gullmarn Fjord	2	Annelida	Polychaeta	Capitellida	_	_
TS3.Leray_6805306	OTU_189	Gullmarn Fjord	2	Annelida	Polychaeta	Phyllodocida	Aphroditidae	Aphrodita	Aphrodita aculeata
TS2.Lobo_6860909	OTU_190	Gullmarn Fjord	1	Annelida	Polychaeta	Terebellida	_	_
TS3.Leray_6729893	OTU_191	Gullmarn Fjord	1	Annelida	Polychaeta	Terebellida	Flabelligeridae	Brada	Brada villosa
TS3.Leray_6744085	OTU_192	Gullmarn Fjord	1	Annelida	Polychaeta	Phyllodocida	_	_
TS4.Leray_7471107	OTU_193	Gullmarn Fjord	1	Annelida	Polychaeta	Phyllodocida	Phyllodocidae	Sige	Sige fusigera
TS5.Leray_1638640	OTU_194	Gullmarn Fjord	1	Annelida	Polychaeta	Terebellida	_	_
TF1.Leray_2445583	OTU_195	Gullmarn Fjord	56	Arthropoda	Malacostraca	Amphipoda	Oedicerotidae	Monoculodes	Monoculodes packardi
TF5.Leray_2897128	OTU_196	Gullmarn Fjord	3	Arthropoda	Maxillopoda	Calanoida	Acartiidae	Acartia	Acartia bifilosa
TS2.Leray_4478240	OTU_197	Gullmarn Fjord	2	Arthropoda	Maxillopoda	Calanoida	Calanidae	Calanus	Calanus euxinus
TS4.Leray_7515925	OTU_198	Gullmarn Fjord	2	Arthropoda	Maxillopoda	Calanoida	Clausocalanidae	Pseudocalanus	Pseudocalanus elongatus
TF1.Leray_2453024	OTU_199	Gullmarn Fjord	1	Arthropoda	Maxillopoda	Calanoida	Temoridae	Temora	Temora longicornis
TS3.Lobo_1208165	OTU_200	Gullmarn Fjord	1	Arthropoda	Maxillopoda	Calanoida	Scolecitrichidae	Scolecithricella	Scolecithricella minor
TF6.Lobo_5251371	OTU_201	Gullmarn Fjord	1	Cnidaria	Hydrozoa	Anthoathecata	Corymorphidae	Corymorpha	Corymorpha nutans
TF1.Lobo_2726978	OTU_202	Gullmarn Fjord	298	Echinodermata	Ophiuroidea	Ophiurida	Ophiotrichidae	Ophiothrix	Ophiothrix fragilis
TS1.Leray_663710	OTU_203	Gullmarn Fjord	3	Echinodermata	Ophiuroidea	Ophiurida	Amphiuridae	Acrocnida	Acrocnida brachiata
TF5.Leray_2879711	OTU_204	Gullmarn Fjord	1	Echinodermata	Ophiuroidea	Ophiurida	Ophiuridae	Ophiura	Ophiura sarsii
TS1.Lobo_4571224	OTU_205	Gullmarn Fjord	4	Mollusca	Bivalvia	Nuculida	Nuculidae	Nucula	Nucula nucleus
TS1.Lobo_4750257	OTU_206	Gullmarn Fjord	2	Mollusca	Gastropoda	Cephalaspidea	_	_
TS1.Lobo_4792606	OTU_207	Gullmarn Fjord	2	Mollusca	Gastropoda	Cephalaspidea	_	_
TS6.Leray_5683559	OTU_208	Gullmarn Fjord	2	Mollusca	Bivalvia	Veneroida	Lucinidae	Lucinoma	Lucinoma borealis
TS2.Leray_4506244	OTU_209	Gullmarn Fjord	1	Mollusca	Bivalvia	Lucinoida	Thyasiridae	Thyasira	Thyasira equalis
TF1.Lobo_2662495	OTU_210	Gullmarn Fjord	1	Nemertea	Palaeonemertea	_	Hubrechtidae	Hubrechtella	Hubrechtella dubia
TS1.Lobo_4586276	OTU_211	Gullmarn Fjord	14	Xenacoelomorpha	_	Acoela	Isodiametridae	Archaphanostoma	Archaphanostoma sp.
TS3.Lobo_1178177	OTU_212	Gullmarn Fjord	4	Xenacoelomorpha	_	Acoela	Childiidae	Childia	Childia macroposthium
Other taxa
ID	O.T.U.	Location	Nb of reads	Phylum	Class	Order	Family	Genus	Species
TS6.Lobo_261524	OTU_213	Gullmarn Fjord	4	Myzozoa	Dinophyceae	Peridiniales	Peridiniida_incertae_sedis	Heterocapsa	Heterocapsa rotundata
B. 18S
Metazoa
ID	O.T.U.	Location	Nb of reads	Phylum	Class	Order	Family	Genus	Species
TF5.SSU_460284	OTU_1	Hållö Island, Gullmarn Fjord	121639	Annelida	_	_	Family_Incertae_Sedis	_
HE7.SSU_239005	OTU_2	Hållö Island, Gullmarn Fjord	67220	Annelida	Polychaeta	Phyllodocida	Sigalionidae	Pisione	Pisione remota
HE6.SSU_371492	OTU_3	Hållö Island, Gullmarn Fjord	49226	Annelida	Polychaeta	Phyllodocida	Syllidae	Brania	Brania sp.
HE4.SSU_913344	OTU_4	Hållö Island, Gullmarn Fjord	37252	Annelida	Polychaeta	Phyllodocida	Glyceridae	Glycera	Glycera sp.
TF5.SSU_453927	OTU_5	Hållö Island, Gullmarn Fjord	2687	Annelida	Clitellata	Haplotaxida	Tubificidae	Tubificoides	Tubificoides insularis
HE3.SSU_123438	OTU_6	Hållö Island, Gullmarn Fjord	1952	Annelida	Polychaeta	Spionida	Spionidae	Spio	Spio sp.
HF3.SSU_985477	OTU_7	Hållö Island, Gullmarn Fjord	1090	Annelida	Polychaeta	_	Orbiniidae	Aricia	Aricia sp.
HF5.SSU_997904	OTU_8	Hållö Island, Gullmarn Fjord	64	Annelida	Polychaeta	Phyllodocida	Goniadidae	Glycinde	Glycinde armigera
TF6.SSU_56595	OTU_9	Hållö Island, Gullmarn Fjord	65992	Arthropoda	Maxillopoda	_	_	_
HF9.SSU_15855	OTU_10	Hållö Island, Gullmarn Fjord	31800	Arthropoda	Maxillopoda	_	_	_
HF2.SSU_208480	OTU_11	Hållö Island, Gullmarn Fjord	21241	Arthropoda	Maxillopoda	_	_	_
HE7.SSU_253407	OTU_12	Hållö Island, Gullmarn Fjord	2584	Arthropoda	Ostracoda	Podocopida	Loxoconchidae	Loxocorniculum	Loxocorniculum mutsuense
HE1.SSU_864375	OTU_13	Hållö Island, Gullmarn Fjord	1160	Arthropoda	Ostracoda	Podocopida	Cytheruridae	Hemicytherura	Hemicytherura kajiyamai
TS2.SSU_812824	OTU_14	Hållö Island, Gullmarn Fjord	433	Arthropoda	Maxillopoda	_	_	_
TF3.SSU_955499	OTU_15	Hållö Island, Gullmarn Fjord	185	Arthropoda	Maxillopoda	_	_	_
HF9.SSU_12142	OTU_16	Hållö Island, Gullmarn Fjord	727	Chordata	Ascidiacea	Phlebobranchia	Ascidiidae	Ascidiella	Ascidiella sp.
HF4.SSU_611685	OTU_17	Hållö Island, Gullmarn Fjord	114	Chordata	Ascidiacea	Phlebobranchia	Corellidae	Corella	Corella inflata
HE7.SSU_239963	OTU_18	Hållö Island, Gullmarn Fjord	45	Chordata	Actinopteri	Perciformes	Eleotridae	Hypseleotris	Hypseleotris sp.
TS3.SSU_518760	OTU_19	Hållö Island, Gullmarn Fjord	7860	Cnidaria	Hydrozoa	Anthoathecata	Corymorphidae	Euphysa	Euphysa sp.
TS3.SSU_472524	OTU_20	Hållö Island, Gullmarn Fjord	2741	Cnidaria	Hydrozoa	_	_	_
TF1.SSU_674740	OTU_21	Hållö Island, Gullmarn Fjord	2212	Cnidaria	Anthozoa	Actiniaria	Edwardsiidae	Nematostella	Nematostella vectensis
TF4.SSU_152912	OTU_22	Hållö Island, Gullmarn Fjord	61418	Echinodermata	_	_	_	_
HE5.SSU_186025	OTU_23	Hållö Island, Gullmarn Fjord	8038	Echinodermata	_	_	_	_
TF4.SSU_155631	OTU_24	Hållö Island, Gullmarn Fjord	5491	Echinodermata	_	_	_	_
HF7.SSU_385728	OTU_25	Hållö Island, Gullmarn Fjord	6934	Gastrotricha	_	Macrodasyida	Cephalodasyidae	Mesodasys	Mesodasys sp.
HF9.SSU_2577	OTU_26	Hållö Island, Gullmarn Fjord	1006	Gastrotricha	_	Chaetonotida	Chaetonotidae	Chaetonotus	Chaetonotus sp.
TF3.SSU_924397	OTU_27	Hållö Island, Gullmarn Fjord	11725	Mollusca	Bivalvia	Veneroida	Semelidae	Abra	Abra sp.
TF6.SSU_44832	OTU_28	Hållö Island, Gullmarn Fjord	3816	Mollusca	Bivalvia	_	_	_
HE9.SSU_317977	OTU_29	Hållö Island, Gullmarn Fjord	1982	Mollusca	Bivalvia	Verenoida	Arcticidae	Arctica	Arctica islandica
TF4.SSU_132537	OTU_30	Hållö Island, Gullmarn Fjord	1581	Mollusca	Gastropoda	Neogastropoda	Nassariidae	Nassarius	Nassarius festivus
HF2.SSU_208561	OTU_31	Hållö Island, Gullmarn Fjord	14	Mollusca	Bivalvia	Anomalodesmata	_	_
TF6.SSU_48167	OTU_32	Hållö Island, Gullmarn Fjord	2940	Nematoda	Chromadorea	Araeolaimida	Comesomatidae	Sabatieria	Sabatieria sp.
TF1.SSU_710679	OTU_33	Hållö Island, Gullmarn Fjord	639	Nematoda	Chromadorea	Chromadorida	Chromadoridae	_
HF9.SSU_20251	OTU_34	Hållö Island, Gullmarn Fjord	636	Nematoda	Desmodorida	Microlaimidae	Calomicrolaimus	_
TS6.SSU_587229	OTU_35	Hållö Island, Gullmarn Fjord	493	Nematoda	Enoplea	Enoplida	Oncholaimidae	Viscosia	Viscosia viscosa
HF1.SSU_779114	OTU_36	Hållö Island, Gullmarn Fjord	65	Nematoda	Chromadorea	Araeolaimida	Axonolaimidae	Odontophora	Odontophora sp.
HE5.SSU_188855	OTU_37	Hållö Island, Gullmarn Fjord	27	Nematoda	Enoplea	Enoplida	Enchelidiidae	Symplocostoma	Symplocostoma sp.
HE3.SSU_121696	OTU_38	Hållö Island, Gullmarn Fjord	12053	Nemertea	Paleonemertea	_	Cephalothricidae	Cephalothrix	Cephalothrix filiformis
TF5.SSU_434928	OTU_39	Hållö Island, Gullmarn Fjord	1760	Nemertea	Paleonemertea	_	Hubrechtidae	Hubrechtella	Hubrechtella dubia
HE4.SSU_908113	OTU_40	Hållö Island, Gullmarn Fjord	877	Nemertea	Anopla	_	Lineidae	Lineus	Lineus bilineatus
TF3.SSU_938615	OTU_41	Hållö Island, Gullmarn Fjord	642	Nemertea	_	_	Family_Incertae_Sedis	_
TF6.SSU_49192	OTU_42	Hållö Island, Gullmarn Fjord	265	Nemertea	Anopla	_	Lineidae	Cerebratulus	Cerebratulus marginatus
HF9.SSU_23023	OTU_43	Hållö Island, Gullmarn Fjord	8367	Platyhelminthes	Rhabditophora	Prolecithophora	Plagiostomidae	Plagiostomum	Plagiostomum cinctum
TS6.SSU_592673	OTU_44	Hållö Island, Gullmarn Fjord	245	Platyhelminthes	Rhabditophora	Rhabdocoela	Trigonostomidae	Proxenetes	Proxenetes sp.
HF9.SSU_24513	OTU_45	Hållö Island, Gullmarn Fjord	59	Platyhelminthes	Rhabditophora	Proseriata	Monocelididae	Monocelis	Monocelis lineata
HE3.SSU_117223	OTU_46	Hållö Island, Gullmarn Fjord	181	Porifera	Calcarea	_	_	_
HF1.SSU_758202	OTU_47	Hållö Island, Gullmarn Fjord	74	Xenacoelomorpha	_	Acoela	Haploposthiidae	Haplogonaria	Haplogonaria sp.
HE3.SSU_116025	OTU_48	Hållö Island, Gullmarn Fjord	28	Xenacoelomorpha	_	Acoela	Isodiametridae	Archaphanostoma	Archaphanostoma sp.
Other Taxa
ID	O.T.U.	Location	Nb of reads	Phylum	Class	Order	Family	Genus	Species
TF5.SSU_414999	OTU_49	Hållö Island, Gullmarn Fjord	111	_	_	_	_	Pirsonia	Pirsonia sp.
TF1.SSU_699642	OTU_50	Hållö Island, Gullmarn Fjord	72	_	_	_	_	Amastigomonas	Amastigomonas sp.
TF6.SSU_32621	OTU_51	Hållö Island, Gullmarn Fjord	22	Amoebozoa	Discosea	Dactylopodida	Vexilliferidae	Neoparamoeba	Neoparamoeba aestuarina
TF3.SSU_929955	OTU_52	Hållö Island, Gullmarn Fjord	16	Amoebozoa	Discosea	Stygamoebida	Stygamoebida_incertae_sedis	Vermistella	Vermistella antartica
TF3.SSU_933268	OTU_53	Hållö Island, Gullmarn Fjord	39	Ascomycota	Saccharomycetes	Saccharomycetales	Phaffomycetaceae	Cyberlindnera	Cyberlindnera jadinii
HF8.SSU_786219	OTU_54	Hållö Island, Gullmarn Fjord	10	Ascomycota	Sordariomycetes	Hypocreales	Cordycipitaceae	Cordyceps	Cordyceps sp.
HE6.SSU_371335	OTU_55	Hållö Island, Gullmarn Fjord	17	Apusozoa	Hilomonadea	_	_	Micronuclearia	Micronuclearia podoventralis
TS4.SSU_542708	OTU_56	Hållö Island, Gullmarn Fjord	320	Bigyra	Labyrinthulea	_	_	_
HE9.SSU_299796	OTU_57	Hållö Island, Gullmarn Fjord	189	Bigyra	Labyrinthulea	Thaustochytriida	Thraustochytriaceae	Aplanochytrium	Aplanochytrium sp.
HF2.SSU_209848	OTU_58	Hållö Island, Gullmarn Fjord	14	Bigyra	Labyrinthulea	Thraustochytriida	Thraustochytriaceae	Thraustochytrium	Thraustochytrium sp.
HE6.SSU_364400	OTU_59	Hållö Island, Gullmarn Fjord	499	Cercozoa	Thecofilosea	_	_	_
TF5.SSU_434418	OTU_60	Hållö Island, Gullmarn Fjord	436	Cercozoa	Imbricatea	Thaumatomonadida	Thaumatomonadidae	_
TF5.SSU_444583	OTU_61	Hållö Island, Gullmarn Fjord	172	Cercozoa	Imbricatea	Marimonadida	_	Pseudopirsonia	Pseudopirsonia mucosa
HF9.SSU_15102	OTU_62	Hållö Island, Gullmarn Fjord	20	Cercozoa	Imbricatea	Marimonadida	_	_
TF1.SSU_703845	OTU_63	Hållö Island, Gullmarn Fjord	16	Cercozoa	_	_	_	_
TF1.SSU_708380	OTU_64	Hållö Island, Gullmarn Fjord	5	Cercozoa	_	_	_	_
TF2.SSU_662343	OTU_65	Hållö Island, Gullmarn Fjord	2314	Chlorophyta	Chlorophyceae	Chlamydomonadales	Coccomyxaceae	Chloricystis	Chloricystis sp.
HE2.SSU_644519	OTU_66	Hållö Island, Gullmarn Fjord	129	Chlorophyta	Ulvophyceae	Cladophora	Cladophoraceae	Cladophora	Cladophora vagabunda
TF5.SSU_426119	OTU_67	Hållö Island, Gullmarn Fjord	96	Chlorophyta	Mamiellophyceae	Mamiellales	Mamiellaceae	Mamiella	Mamiella sp.
HE3.SSU_125040	OTU_68	Hållö Island, Gullmarn Fjord	78	Chlorophyta	Ulvophyceae	Ulvales	Ulvellaceae	Acrochaete	Acrochaete leptochaete
TF1.SSU_671187	OTU_69	Hållö Island, Gullmarn Fjord	10	Chlorophyta	Mamiellophyceae	Mamiellales	Mamiellaceae	Micromonas	Micromonas sp.
TF6.SSU_84115	OTU_70	Hållö Island, Gullmarn Fjord	133	Choanozoa	Choanoflagellatea	Acanthoecida	Acanthoecidae	_
TF6.SSU_76275	OTU_71	Hållö Island, Gullmarn Fjord	2995	Chytridiomycota	_	_	_	_
TF5.SSU_463446	OTU_72	Hållö Island, Gullmarn Fjord	366	Chytridiomycota	_	_	_	_
TF5.SSU_428467	OTU_73	Hållö Island, Gullmarn Fjord	412	Ciliophora	Litostomatea	Haptorida	Didiniidae	Didinium	Didinium sp.
TF6.SSU_37164	OTU_74	Hållö Island, Gullmarn Fjord	222	Ciliophora	Oligohymenophorea	Apostomatida	Foettingeriidae	Hyalophysa	Hyalophysa lwoffi
TF1.SSU_694244	OTU_75	Hållö Island, Gullmarn Fjord	80	Ciliophora	Oligotrichia	_	_	_
TF6.SSU_44468	OTU_76	Hållö Island, Gullmarn Fjord	57	Ciliophora	Oligohymenophorea	_	_	_
TF6.SSU_36890	OTU_77	Hållö Island, Gullmarn Fjord	55	Ciliophora	Spirotrichea	_	_	_
TF1.SSU_676102	OTU_78	Hållö Island, Gullmarn Fjord	13	Ciliophora	Karyorelictea	Protostomatida	Tracheolocercidae	Trachelocerca	Trachelocerca sp.
TF1.SSU_712302	OTU_79	Hållö Island, Gullmarn Fjord	3	Ciliophora	Spirotrichea	Urostylida	Urostylidae	Holosticha	Holosticha sp.
TF5.SSU_445414	OTU_80	Hållö Island, Gullmarn Fjord	27	Cryptophyta	Katablepharidophyceae	Katablepharidales	Kathablepharidae	_
HF2.SSU_206300	OTU_81	Hållö Island, Gullmarn Fjord	18	Cryptophyta	Cryptophyceae	Cryptomonadales	Cryptomonadaceae	Goniomonas	Goniomonas sp.
TF3.SSU_942304	OTU_82	Hållö Island, Gullmarn Fjord	83	Haptophyta	Prymnesiophyceae	Isochrysidales	Noelaerhabdaceae	Emiliania	Emiliania sp.
TF5.SSU_428806	OTU_83	Hållö Island, Gullmarn Fjord	140	Myzozoa	Dinophyceae	Peridiniales	Peridiniaceae	Scrippsiella	Scrippsiella sp.
TF6.SSU_87354	OTU_84	Hållö Island, Gullmarn Fjord	65	Myzozoa	Dinophyceae	Gymnodiniales	Gymnodiniaceae	Gymnodinium	Gymnodinium aureolum
TF6.SSU_45289	OTU_85	Hållö Island, Gullmarn Fjord	60	Myzozoa	Dinophyceae	Lophodiniales	Lophodiniaceae	Woloszynskia	Woloszynskia sp.
TF1.SSU_682362	OTU_86	Hållö Island, Gullmarn Fjord	55	Myzozoa	Dinophyceae	Gonyaulacales	Gonyaulacaceae	Alexandrium	Alexandrium taylori
TF1.SSU_725136	OTU_87	Hållö Island, Gullmarn Fjord	47	Myzozoa	Dinophyceae	Gonyaulacales	Gonyaulacaceae	Alexandrium	Alexandrium tamarense
TF1.SSU_676096	OTU_88	Hållö Island, Gullmarn Fjord	40	Myzozoa	Dinophyceae	Syndiniales	_	_
TF1.SSU_686066	OTU_89	Hållö Island, Gullmarn Fjord	10	Myzozoa	Dinophyceae	Gonyaulacales	Gonyaulacaceae	Protoceratium	Protoceratium reticulatum
TF1.SSU_682566	OTU_90	Hållö Island, Gullmarn Fjord	6	Myzozoa	Dinophyceae	Gonyaulacales	Gonyaulacaceae	Alexandrium	Alexandrium ostenfeldii
TF3.SSU_924655	OTU_91	Hållö Island, Gullmarn Fjord	40001	Ochrophyta	Bacillariophyceae	Thalassiosirales	Thalassiosiraceae	Thalassiosira	Thalassiosira sp.
TF6.SSU_72524	OTU_92	Hållö Island, Gullmarn Fjord	7901	Ochrophyta	Bacillariophycae	Thalassiosirales	Skeletonemaceae	Skeletonema	Skeletonema sp.
TF1.SSU_704225	OTU_93	Hållö Island, Gullmarn Fjord	6628	Ochrophyta	Mediophyceae	_	_	_
HF2.SSU_201804	OTU_94	Hållö Island, Gullmarn Fjord	2726	Ochrophyta	Bacillariophycae	_	_	_
HE4.SSU_910945	OTU_95	Hållö Island, Gullmarn Fjord	1013	Ochrophyta	Phaeophyceae	_	_	_
TF6.SSU_79378	OTU_96	Hållö Island, Gullmarn Fjord	535	Ochrophyta	_	_	_	_
TF3.SSU_921429	OTU_97	Hållö Island, Gullmarn Fjord	393	Ochrophyta	Mediophyceae	_	_	_
HF2.SSU_211104	OTU_98	Hållö Island, Gullmarn Fjord	201	Ochrophyta	Dictyochophyceae	Pedinellales	Pedinellaceae	Pteridomonas	Pteridomonas sp.
TF1.SSU_711003	OTU_99	Hållö Island, Gullmarn Fjord	66	Ochrophyta	Bacillariophycae	Chaetocerotanae_incertae_sedis	Chaetocerotaceae	Chaetoceros	Chaetoceros sp.
TF1.SSU_750708	OTU_100	Hållö Island, Gullmarn Fjord	42	Ochrophyta	Bacillariophycae	Chaetocerotanae_incertae_sedis	Chaetocerotaceae	Chaetoceros	Chaetoceros sp.
TF1.SSU_750272	OTU_101	Hållö Island, Gullmarn Fjord	6	Ochrophyta	Bacillariophycae	Leptocylindrales	Leptocylindraceae	Leptocylindrus	Leptocylindrus minimus
HF9.SSU_21842	OTU_102	Hållö Island, Gullmarn Fjord	797	Oomycota	Peronosporomycetes	_	_	_
TF1.SSU_708294	OTU_103	Hållö Island, Gullmarn Fjord	197	Oomycota	Peronosporomycetes	_	_	_
TF5.SSU_469809	OTU_104	Hållö Island, Gullmarn Fjord	46	Oomycota	Peronosporomycetes	_	_	_
HE8.SSU_840018	OTU_105	Hållö Island, Gullmarn Fjord	5	Oomycota	Peronosporomycetes	Lagenidiales	Haliphthoraceae	Halocrusticida	Halocrusticida sp.
HE6.SSU_373244	OTU_106	Hållö Island, Gullmarn Fjord	83	Rhodophyta	Florideophycidae	Ceramiales	Rhodomelaceae	Polysiphonia	Polysiphonia sp.
HE3.SSU_118553	OTU_107	Hållö Island, Gullmarn Fjord	54	Rhodophyta	Bangiophyceae	Bangiales	Bangiaceae	Pyropia	Pyropia sp.
HF9.SSU_28170	OTU_108	Hållö Island, Gullmarn Fjord	7	Rhodophyta	Florideophycidae	_	_	_
Metazoa
ID	O.T.U.	Location	Nb of reads	Phylum	Class	Order	Family	Genus	Species
HF9.SSU_25735	OTU_109	Hållö Island	3753	Annelida	Polychaeta	_	Dinophilidae	Trilobodrilus	Trilobodrilus heideri
HE2.SSU_637269	OTU_110	Hållö Island	49	Annelida	Polychaeta	Phyllodocida	Nereididae	Platynereis	Platynereis dumerilii
HF9.SSU_7624	OTU_111	Hållö Island	12	Annelida	Clitellata	Enchytraeida	Enchytraeidae	Grania	Grania sp.
HF6.SSU_322303	OTU_112	Hållö Island	10	Annelida	Polychaeta	_	Protodriloididae	Protodriloides	Protodriloides chaetifer
HE6.SSU_350003	OTU_113	Hållö Island	5	Annelida	Polychaeta	Phyllodocida	Syllidae	Myrianida	Myrianida sp.
HF2.SSU_202737	OTU_114	Hållö Island	4	Annelida	Polychaeta	Sabellida	Serpulidae	Laeospira	Laeospira corallinae
HE2.SSU_640060	OTU_115	Hållö Island	3	Annelida	Polychaeta	Sabellida	Oweniidae	Myriochele	Myriochele sp.
HF6.SSU_324605	OTU_116	Hållö Island	2	Annelida	Polychaeta	Phyllodocida	Nereididae	Nereis	Nereis pelagica
HE8.SSU_832291	OTU_117	Hållö Island	1	Annelida	Polychaeta	Phyllodocida	Goniadidae	Progoniada	Progoniada regularis
HE8.SSU_834197	OTU_118	Hållö Island	1	Annelida	Polychaeta	Sabellida	Fabriciidae	Fabriciola	Fabriciola liguronis
HF2.SSU_193854	OTU_119	Hållö Island	1	Annelida	Polychaeta	Terebellida	Flabelligeridae	Flabelligera	Flabelligera sp.
HF4.SSU_622170	OTU_120	Hållö Island	1	Annelida	Polychaeta	_	Scalibregmatidae	Scalibregma	Scalibregma inflatum
HE5.SSU_184679	OTU_121	Hållö Island	149	Arthropoda	Malacostraca	_	_	_
HE2.SSU_646490	OTU_122	Hållö Island	123	Arthropoda	Pycnogonida	Pantopoda	Callipallenidae	Callipallene	Callipallene sp.
HF5.SSU_994971	OTU_123	Hållö Island	7	Arthropoda	Malacostraca	Decapoda	Leucosiidae	Praebebalia	Praebebalia longidactyla
HE5.SSU_181011	OTU_124	Hållö Island	1	Arthropoda	Pycnogonida	Pantopoda	Phoxichidiidae	Anoplodactylus	Anoplodactylus californicus
HE8.SSU_832214	OTU_125	Hållö Island	1	Arthropoda	Malacostraca	Decapoda	Processidae	Nikoides	Nikoides sp.
HE2.SSU_638224	OTU_126	Hållö Island	23	Bryozoa	_	_	_	_
HE1.SSU_850917	OTU_127	Hållö Island	4	Bryozoa	Stenolaemata	Cyclostomatida	Tubuliporidae	Tubulipora	Tubulipora lobifera
HE6.SSU_373369	OTU_128	Hållö Island	2	Bryozoa	Stenolaemata	Cyclostomatida	Plagioeciidae	Plagioecia	Plagioecia patina
HE8.SSU_834024	OTU_129	Hållö Island	11058	Chordata	Leptocardii	_	Branchiostomatidae	Branchiostoma	Branchiostoma sp.
HE9.SSU_314754	OTU_130	Hållö Island	616	Chordata	Ascidiacea	Stolidobranchia	Styelidae	Styela	Styela plicata
HE2.SSU_639404	OTU_131	Hållö Island	209	Chordata	Ascidiacea	Stolidobranchia	Molgulidae	Molgula	Molgula sp.
HE3.SSU_123107	OTU_132	Hållö Island	4	Chordata	Ascidiacea	_	_	_
HE2.SSU_639670	OTU_133	Hållö Island	1	Cnidaria	Hydrozoa	Leptothecatha	Sertulariidae	Abietinaria	Abietinaria filicula
HE4.SSU_914821	OTU_134	Hållö Island	1	Echinodermata	Holothuroidea	Apodida	Synaptidae	Leptosynapta	Leptosynapta sp.
HE7.SSU_242889	OTU_135	Hållö Island	3013	Gastrotricha	_	Macrodasyida	Thaumastodermatidae	Tetranchyroderma	Tetranchyroderma thysanophorum
HF5.SSU_995416	OTU_136	Hållö Island	636	Gastrotricha	_	Macrodasyida	Macrodasyidae	Macrodasys	Macrodasys sp.
HF2.SSU_192734	OTU_137	Hållö Island	479	Gastrotricha	_	Macrodasyida	Macrodasyidae	Macrodasys	Macrodasys sp.
HF1.SSU_770513	OTU_138	Hållö Island	339	Gastrotricha	_	Macrodasyida	Thaumastodermatidae	Thaumastoderma	Thaumastoderma ramuliferum
HE7.SSU_244283	OTU_139	Hållö Island	249	Gastrotricha	_	Macrodasyida	Thaumastodermatidae	Diplodasys	Diplodasys meloriae
HF5.SSU_996540	OTU_140	Hållö Island	161	Gastrotricha	_	Macrodasyida	Lepidodasyidae	Lepidodasys	Lepidodasys sp.
HF1.SSU_760431	OTU_141	Hållö Island	5	Gastrotricha	_	Macrodasyida	Macrodasyidae	Urodasys	Urodasys sp.
HF8.SSU_788507	OTU_142	Hållö Island	1	Mollusca	Bivalvia	Limoida	Limidae	Limaria	Limaria hians
HE3.SSU_124287	OTU_143	Hållö Island	13	Nematoda	Enoplea	Enoplida	Thoracostomopsidae	Enoploides	Enoploides sp.
HE3.SSU_110275	OTU_144	Hållö Island	8	Nematoda	Enoplea	Enoplida	Enoplidae	Enoplus	Enoplus sp.
HF1.SSU_759758	OTU_145	Hållö Island	4	Nematoda	Chromadorea	Plectida	Leptolaimidae	_
HF2.SSU_192072	OTU_146	Hållö Island	2	Nematoda	Chromadorea	Chromadorida	Chromadoridae	Chromadora	Chromadora nudicapitata
HF9.SSU_3582	OTU_147	Hållö Island	6	Nemertea	Paleonemertea	_	Tubulanidae	Callinera	Callinera grandis
HE9.SSU_303121	OTU_148	Hållö Island	1939	Platyhelminthes	Rhabditophora	Haplopharyngida	Haplopharyngidae	Haplopharynx	Haplopharynx rostratus
HF4.SSU_616041	OTU_149	Hållö Island	771	Platyhelminthes	Rhabditophora	Seriata	_	_
HE2.SSU_650311	OTU_150	Hållö Island	8	Platyhelminthes	Rhabditophora	Prolecithophora	Cylindrostomidae	Cylindrostoma	Cylindrostoma sp.
HE5.SSU_177399	OTU_151	Hållö Island	4	Platyhelminthes	Rhabditophora	Prolecithophora	Cylindrostomidae	Euxinia	Euxinia baltica
HF2.SSU_201740	OTU_152	Hållö Island	2	Platyhelminthes	Rhabditophora	Rhabdocoela	Polycystididae	Phonorhynchus	Phonorhynchus helgolandicus
HF1.SSU_773830	OTU_153	Hållö Island	1	Platyhelminthes	Rhabditophora	Prolecithophora	Cylindrostomidae	Allostoma	Allostoma neostiliferum
HE7.SSU_223989	OTU_154	Hållö Island	12	Porifera	Demospongiae	Chondrillida	Halisarcidae	Halisarca	Halisarca dujardini
HF9.SSU_26977	OTU_155	Hållö Island	8	Porifera	Demospongiae	Clionaida	Clionaidae	Spheciospongia	Spheciospongia vesparium
HE6.SSU_383060	OTU_156	Hållö Island	3	Sipuncula	Sipunculidea	Golfingiida	Sipunculidae	Phascolopsis	Phascolopsis gouldii
HE6.SSU_348954	OTU_157	Hållö Island	2	Tardigrada	Eutardigrada	Parachela	Hypsibiidae	Halobiotus	Halobiotus crispae
HF2.SSU_190395	OTU_158	Hållö Island	2386	Xenacoelomorpha	_	Acoela	Mecynostomidae	Eumecynostomum	Eumecynostomum sp.
HF9.SSU_13290	OTU_159	Hållö Island	5	Xenacoelomorpha	_	Nemertodermatida	Ascoparridae	Flagellophora	Flagellophora apelti
HF9.SSU_26335	OTU_160	Hållö Island	1	Xenacoelomorpha	_	Acoela	Isodiametridae	Archaphanostoma	Archaphanostoma sp.
Other Taxa
ID	O.T.U.	Location	Nb of reads	Phylum	Class	Order	Family	Genus	Species
HE1.SSU_864302	OTU_161	Hållö Island	1	_	_	_	_	Amastigomonas	Amastigomonas sp.
HE7.SSU_237525	OTU_162	Hållö Island	2	Apusozoa	_	_	Mantamonadidae	Mantamonas	Mantamonas plastica
HF6.SSU_322756	OTU_163	Hållö Island	3	Ascomycota	Sordariomycetes	_	_	_
HE5.SSU_184368	OTU_164	Hållö Island	4	Bigyra	Bicoecea	Anoecida	Caecitellidae	Caecitellus	Caecitellus parvulus
HE6.SSU_360624	OTU_165	Hållö Island	4	Bigyra	Bicoecea	Bicoecida	Bicosoecaceae	Bicosoeca	Bicosoeca vacillans
HE8.SSU_829853	OTU_166	Hållö Island	3	Bigyra	Labyrinthulea	Labyrinthulida	Labyrinthulaceae	Labyrinthula	Labyrinthula sp.
HE4.SSU_913670	OTU_167	Hållö Island	1	Bigyra	_	_	_	_
HF1.SSU_772028	OTU_168	Hållö Island	7	Cercozoa	_	_	_	_
HF9.SSU_29871	OTU_169	Hållö Island	7	Cercozoa	Imbricatea	Euglyphida	Cyphoderiidae	Cyphoderia	Cyphoderia sp.
HE4.SSU_916681	OTU_170	Hållö Island	5	Cercozoa	Imbricatea	Euglyphida	Cyphoderiidae	_
HF2.SSU_209027	OTU_171	Hållö Island	4	Cercozoa	_	_	_	_
HE8.SSU_841463	OTU_172	Hållö Island	2	Cercozoa	_	_	_	Metromonas	Metromonas sp.
HE7.SSU_251485	OTU_173	Hållö Island	2	Chlorophyta	Trebouxiophyceae	_	_	_
HF8.SSU_803987	OTU_174	Hållö Island	1	Chlorophyta	Nephroselmidophyceae	Nephroselmidales	Nephroselmidaceae	Nephroselmis	Nephroselmis sp.
HF2.SSU_189063	OTU_175	Hållö Island	1	Chytridiomycota	_	_	_	_
HF9.SSU_11594	OTU_176	Hållö Island	13	Ciliophora	Litostomatea	Pleurostomatida	Litonotidae	Loxophyllum	Loxophyllum sp.
HE1.SSU_868024	OTU_177	Hållö Island	1	Ciliophora	Oligohymenophorea	Peniculida	Frontoniidae	Frontonia	Frontonia sp.
HE3.SSU_114042	OTU_178	Hållö Island	1	Ciliophora	Oligotrichea	Choreotrichida	Tintinnidae	Eutintinnus	Eutintinnus pectinis
HF7.SSU_396009	OTU_179	Hållö Island	1	Ciliophora	Spirotrichea	Euplotida	Aspidiscidae	Aspidisca	Aspidisca sp.
HF9.SSU_6313	OTU_180	Hållö Island	25	Cryptophyta	Cryptophyceae	Pyrenomonadales	Pyrenomonadaceae	Rhodomonas	Rhodomonas sp.
HE6.SSU_370909	OTU_181	Hållö Island	1	Haptophyta	Prymnesiophyceae	Prymnesiophyceae_incertae_sedis	_	Spongomonas	Spongomonas sp.
HF6.SSU_335714	OTU_182	Hållö Island	1	Myzozoa	Dinophyceae	Gonyaulacales	Ceratiaceae	Neoceratium	Neroceratium sp.
HF9.SSU_17063	OTU_183	Hållö Island	21	Ochrophyta	Bacillariophycae	Lyrellales	Lyrellaceae	Lyrella	Lyrella sp.
HF9.SSU_26153	OTU_184	Hållö Island	20	Ochrophyta	Bacillariophycae	Toxariales	Toxariaceae	Toxarium	Toxarium sp.
HF7.SSU_399727	OTU_185	Hållö Island	10	Ochrophyta	Bacillariophyceae	Thalassiosirales	Thalassiosiraceae	Porosira	Porosira pseudodenticulata
HF7.SSU_394487	OTU_186	Hållö Island	7	Ochrophyta	Dictyochophyceae	Rhizochromulinales	Rhyzochromulinaceae	Rhizochromulina	Rhizochromulina cf. marina
HE5.SSU_181302	OTU_187	Hållö Island	2	Ochrophyta	_	_	_	_
HE7.SSU_220258	OTU_188	Hållö Island	2	Ochrophyta	Bacillariophycae	Surirellales	Surirellaceae	Campylodiscus	Campylodiscus thuretii
HE5.SSU_177685	OTU_189	Hållö Island	1	Ochrophyta	Bacillariophyceae	Coscinodiscales	Coscinodiscaceae	Coscinodiscus	Coscinodiscus radiatus
HE6.SSU_347694	OTU_190	Hållö Island	1	Ochrophyta	Bacillariophycae	Rhizosoleniales	Rhizosoleniaceae	Guinardia	Guinardia flaccida
HF8.SSU_785422	OTU_191	Hållö Island	1	Ochrophyta	Florideophycidae	Corallinales	Corallinaceae	Spongites	Spongites sp.
HE3.SSU_120692	OTU_192	Hållö Island	188	Rhodophyta	Florideophycidae	Ceramiales	Callithamniaceae	Callithamnion	Callithamnion collabens
HE3.SSU_125402	OTU_193	Hållö Island	39	Rhodophyta	Compsopogonophyceae	Erythropeltidales	Erythrotrichiaceae	Erythrotrichia	Erythrotrichia carnea
HE5.SSU_176503	OTU_194	Hållö Island	39	Rhodophyta	Florideophycidae	Corallinales	_	_
HE1.SSU_853290	OTU_195	Hållö Island	26	Rhodophyta	Florideophycidae	Bonnemaisoniales	Bonnemaisoniaceae	Bonnemaisonia	Bonnemaisonia hamifera
HE3.SSU_112783	OTU_196	Hållö Island	21	Rhodophyta	Bangiophyceae	Bangiales	Bangiaceae	Porphyra	Porphyra sp.
HE3.SSU_112575	OTU_197	Hållö Island	17	Rhodophyta	Florideophycidae	Corallinales	Corallinaceae	Corallina	Corallina officinalis
HE4.SSU_915725	OTU_198	Hållö Island	1	Rhodophyta	Florideophycidae	Ceramiales	Dasyaceae	Heterosiphonia	Heterosiphonia plumosa
HE9.SSU_310235	OTU_199	Hållö Island	1	Rhodophyta	Florideophycidae	Ceramiales	Callithamniaceae	Seirospora	Seirospora interrupta
Metazoa
ID	O.T.U.	Location	Nb of reads	Phylum	Class	Order	Family	Genus	Species
TS5.SSU_883475	OTU_200	Gullmarn Fjord	4155	Annelida	Polychaeta	Terebellida	Trichobranchidae	Terebellides	Terebellides stroemii
TS3.SSU_517096	OTU_201	Gullmarn Fjord	1407	Annelida	Polychaeta	Spionida	Spionidae	Laonice	Laonice sp.
TF6.SSU_63146	OTU_202	Gullmarn Fjord	669	Annelida	Polychaeta	Terebellida	Pectinariidae	Pectinaria	Pectinaria sp.
TS3.SSU_480632	OTU_203	Gullmarn Fjord	189	Annelida	Polychaeta	Phyllodocida	Aphroditidae	Aphrodita	Aphrodita sp.
TS5.SSU_869292	OTU_204	Gullmarn Fjord	123	Annelida	Polychaeta	Spionida	Apistobranchidae	Apistobranchus	Apistobranchus sp.
TS5.SSU_870099	OTU_205	Gullmarn Fjord	69	Annelida	Polychaeta	Phyllodocida	Goniadidae	Goniada	Goniada maculata
TS5.SSU_882766	OTU_206	Gullmarn Fjord	60	Annelida	Polychaeta	Terebellida	Flabelligeridae	Diplocirrus	Diplocirrus glaucus
TS3.SSU_470635	OTU_207	Gullmarn Fjord	59	Annelida	_	_	_	_
TF6.SSU_42415	OTU_208	Gullmarn Fjord	2	Annelida	Polychaeta	Phyllodocida	Polynoidae	Harmothoe	Harmothoe imbricata
TF5.SSU_470101	OTU_209	Gullmarn Fjord	360	Arthropoda	Maxillopoda	Harpacticoida	Miraciidae	Typhlamphiascus	Typhlamphiascus typhlops
TF4.SSU_139713	OTU_210	Gullmarn Fjord	193	Arthropoda	Branchiopoda	_	_	_
TF5.SSU_412099	OTU_211	Gullmarn Fjord	18	Cephalorhyncha	Kinorhyncha	Homalorhagida	Pycnophyidae	Pycnophyes	Pycnophyes kielensis
TS5.SSU_881395	OTU_212	Gullmarn Fjord	25	Echinodermata	_	_	_	_
TS2.SSU_822141	OTU_213	Gullmarn Fjord	938	Platyhelminthes	Rhabditophora	Prolecithophora	Plagiostomidae	Plagiostomum	Plagiostomum cuticulata
TF6.SSU_52738	OTU_214	Gullmarn Fjord	214	Platyhelminthes	Rhabditophora	Prolecithophora	Plagiostomidae	Plagiostomum	Plagiostomum striatum
TF5.SSU_433159	OTU_215	Gullmarn Fjord	2	Platyhelminthes	Rhabditophora	Prolecithophora	Ulianiniidae	Ulianinia	Ulianinia mollissima
TS2.SSU_818002	OTU_216	Gullmarn Fjord	1	Platyhelminthes	Rhabditophora	Cestoda	Eucestoda_incertae_sedis	_
TS6.SSU_601153	OTU_217	Gullmarn Fjord	28	Xenacoelomorpha	_	Nemertodermatida	Nemertodermatidae	Nemertoderma	Nemertoderma westbladi
TF3.SSU_927927	OTU_218	Gullmarn Fjord	2	Xenacoelomorpha	_	_	_	_
TS2.SSU_815721	OTU_219	Gullmarn Fjord	2	Xenacoelomorpha	_	Acoela	Childiidae	Childia	Childia sp.
TS2.SSU_815970	OTU_220	Gullmarn Fjord	1	Xenacoelomorpha	_	Acoela	Childiidae	Childia	Childia sp.
Other taxa
ID	O.T.U.	Location	Nb of reads	Phylum	Class	Order	Family	Genus	Species
TF3.SSU_937781	OTU_221	Gullmarn Fjord	5	Amoebozoa	Discosea	Stygamoebida	Stygamoebida_incertae_sedis	Stygamoeba	Stygamoeba regulata
TF6.SSU_98053	OTU_222	Gullmarn Fjord	15	Cercozoa	_	_	_	Massisteria	Massisteria sp.
TF6.SSU_45943	OTU_223	Gullmarn Fjord	20	Ciliophora	Oligotrichea	Choreotrichida	Ptychocylididae	Favella	Favella sp.
TF1.SSU_676538	OTU_224	Gullmarn Fjord	7	Haptophyta	Pavlovophyceae	Pavlovales	Pavlovaceae	Diacronema	Diacronema vlkianum
TF1.SSU_752483	OTU_225	Gullmarn Fjord	2	Haptophyta	Prymnesiophyceae	Coccosphaerales	Braarudosphaeraceae	Braarudosphaera	Braarudosphaera sp.
TF4.SSU_153853	OTU_226	Gullmarn Fjord	119	Myzozoa	Dinophyceae	Syndiniales	_	_
TF6.SSU_58784	OTU_227	Gullmarn Fjord	37	Myzozoa	Dinophyceae	Gymnodiniales	Polykrikaceae	Polykrikos	Polykrikos kofoidii
TF3.SSU_917500	OTU_228	Gullmarn Fjord	22	Myzozoa	Dinophyceae	Syndiniales	_	_
TF6.SSU_35305	OTU_229	Gullmarn Fjord	22	Myzozoa	Perkinsea	Perkinsida	Perkinsidae	Parvilucifera	Parvilucifera sp.
TF6.SSU_46826	OTU_230	Gullmarn Fjord	17	Myzozoa	Dinophyceae	Syndiniales
TF3.SSU_930124	OTU_231	Gullmarn Fjord	3	Myzozoa	Dinophyceae	Peridiniales	Protoperidiniaceae	Protoperidinium	Protoperidinium conicum
TF3.SSU_966679	OTU_232	Gullmarn Fjord	2	Myzozoa	Dinophyceae	Syndiniales	Amoebophryaceae	Amoebophrya	Amoebophrya sp.
TF6.SSU_76750	OTU_233	Gullmarn Fjord	2	Myzozoa	Dinophyceae	Syndiniales	_	_
TF1.SSU_728375	OTU_234	Gullmarn Fjord	1	Myzozoa	Dinophyceae	Gymnodiniales	Gymnodiniaceae	Pelagodinium	Pelagodinium beii
TF4.SSU_138550	OTU_235	Gullmarn Fjord	1108	Ochrophyta	Bacillariophycae	Chaetocerotanae_incertae_sedis	Chaetocerotaceae	Chaetoceros	Chaetoceros dydimus
TF3.SSU_973165	OTU_236	Gullmarn Fjord	561	Ochrophyta	Bacillariophycae	Coscinodiscales	Coscinodiscaceae	Coscinodiscus	Coscinodiscus sp.
TF1.SSU_673928	OTU_237	Gullmarn Fjord	7	Ochrophyta	Bacillariophycae	Chaetocerotanae_incertae_sedis	Chaetocerotaceae	Chaetoceros	Chaetoceros sp.
TF1.SSU_674448	OTU_238	Gullmarn Fjord	3	Ochrophyta	Bacillariophycae	Rhizosoleniales	Rhizosoleniaceae	Rhizosolenia	Rhizosolenia setigera
TF1.SSU_730320	OTU_239	Gullmarn Fjord	3	Ochrophyta	Bacillariophycae	Chaetocerotanae_incertae_sedis	Chaetocerotaceae	Chaetoceros	Chaetoceros radicans
TF1.SSU_709934	OTU_240	Gullmarn Fjord	2	Ochrophyta	Bacillariophycae	Coscinodiscales	Hemidiscaceae	Actinocyclus	Actinocyclus sp.
TF1.SSU_744741	OTU_241	Gullmarn Fjord	1	Ochrophyta	Bolidophyceae	Bolidomonadales	Bolidomonadaceae	Bolidomonas	Bolidomonas sp.
TF5.SSU_411611	OTU_242	Gullmarn Fjord	1	Ochrophyta	Dictyochophyceae	Pedinellales	Pedinellaceae	Pseudopedinella	Pseudopedinella elastica
TF1.SSU_713593	OTU_243	Gullmarn Fjord	3	Rhodophyta	Porphyridiophyceae	Porphyridiales	Porphyridiophyceae	Porphyridium	Porphyridium sp.
